# Supplementary material for: Adamantane substitutions: a path to high-performing, soluble, versatile and sustainable organic semiconducting materials
Source: Royal Society of Chemistry journal article supplement (doi:10.1039/c6tc05076j), 2017-01-01

## SUPPORTING INFORMATION

### NMR spectra:

#### 500MHz Full $^1\text{H}$

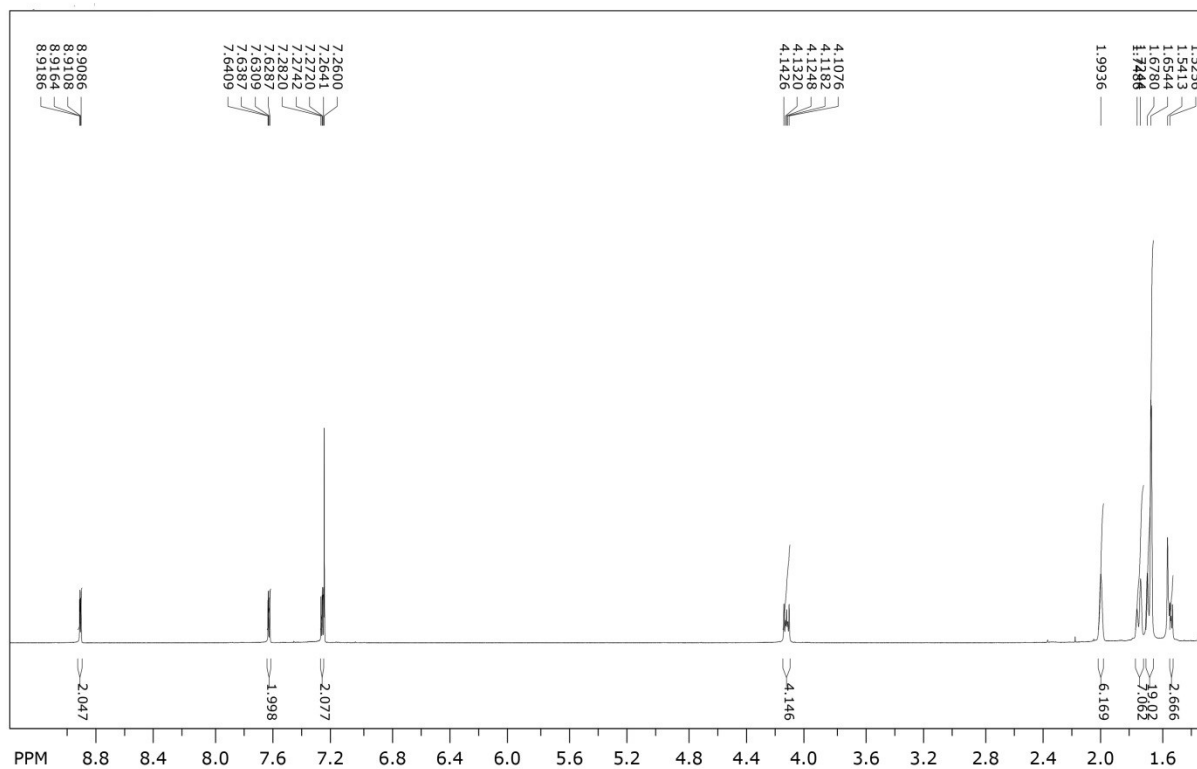

#### 500MHz Aromatic $^1\text{H}$

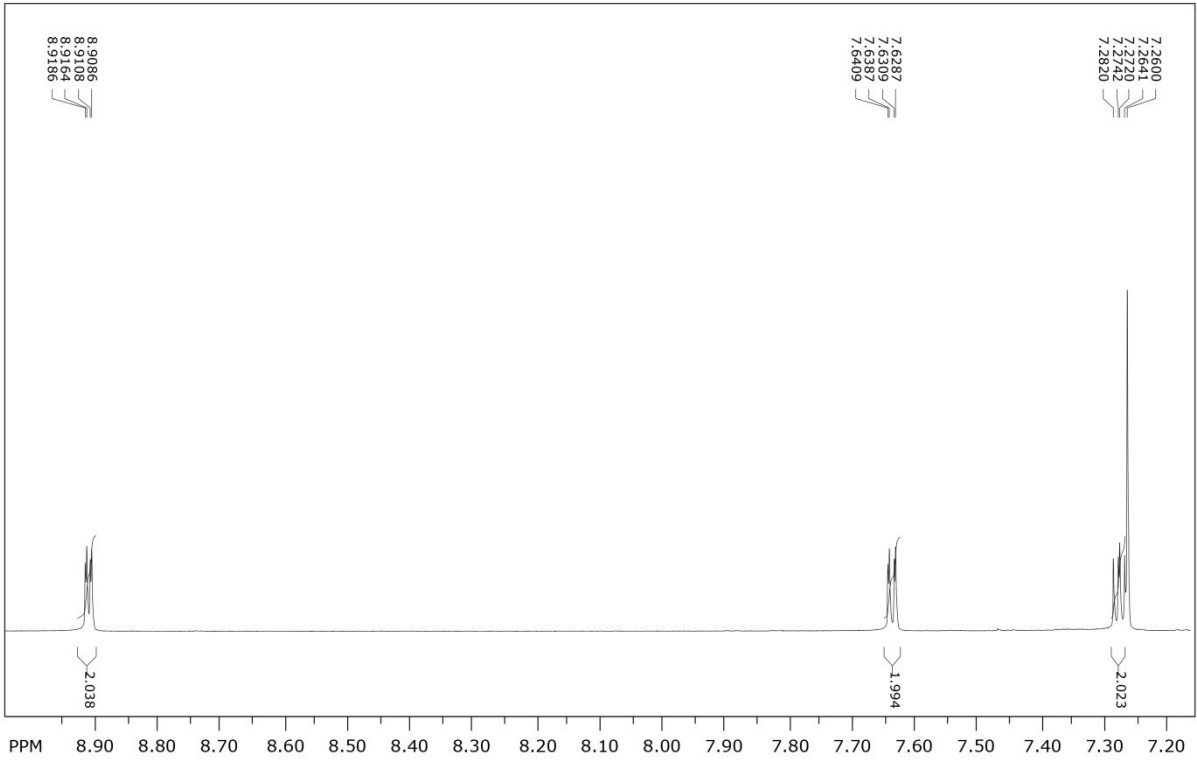

**500MHz Aliphatic <sup>1</sup>H**

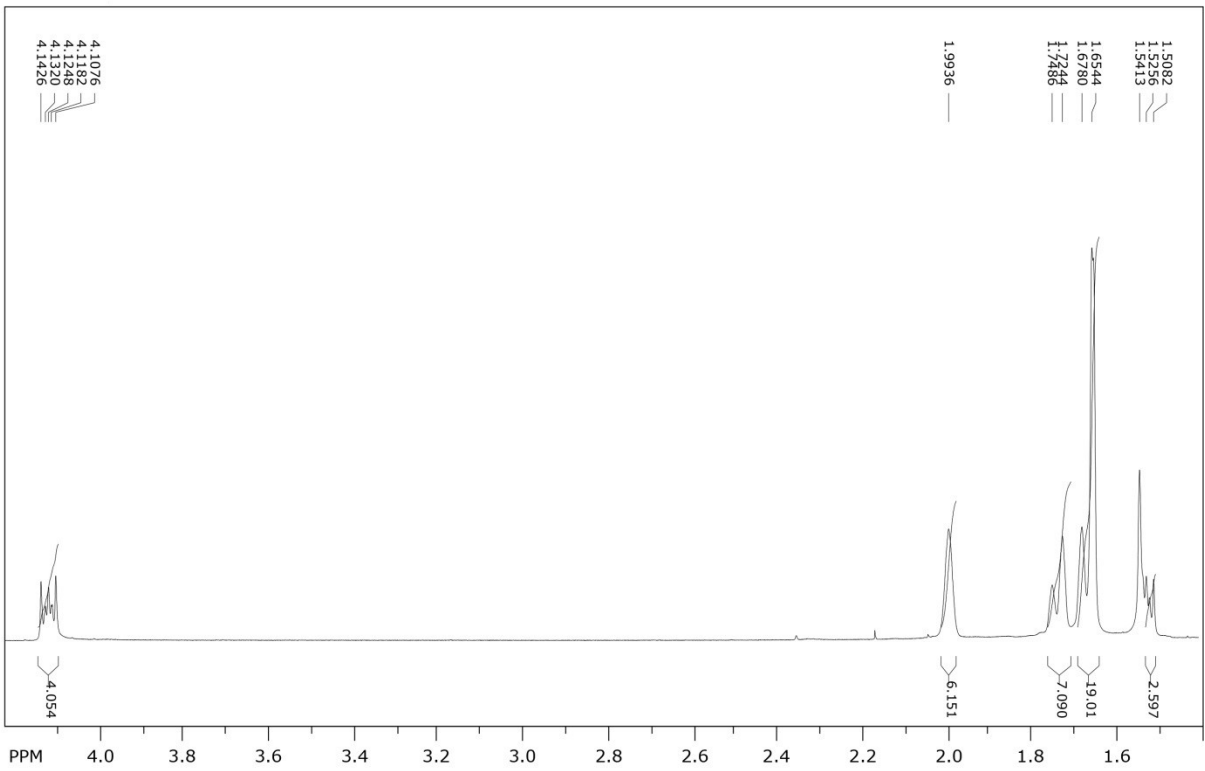

**500MHz Full <sup>13</sup>C**

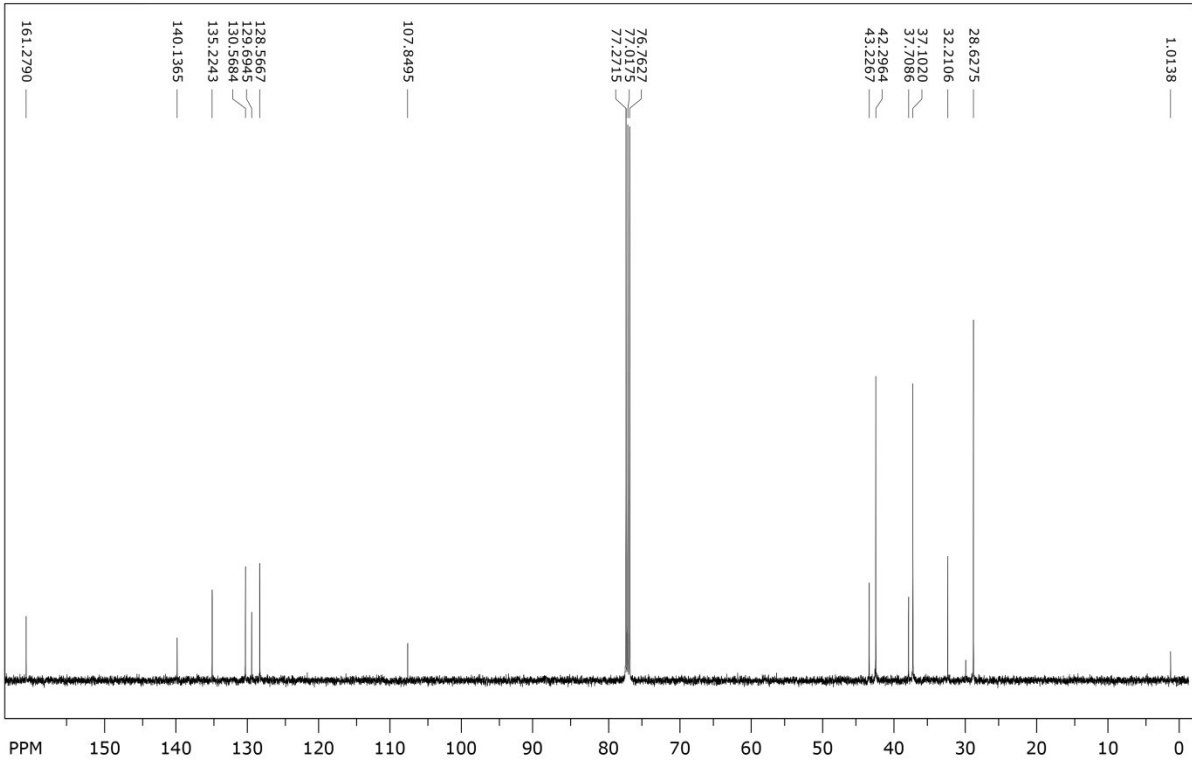

**Thermogravimetric analysis:**

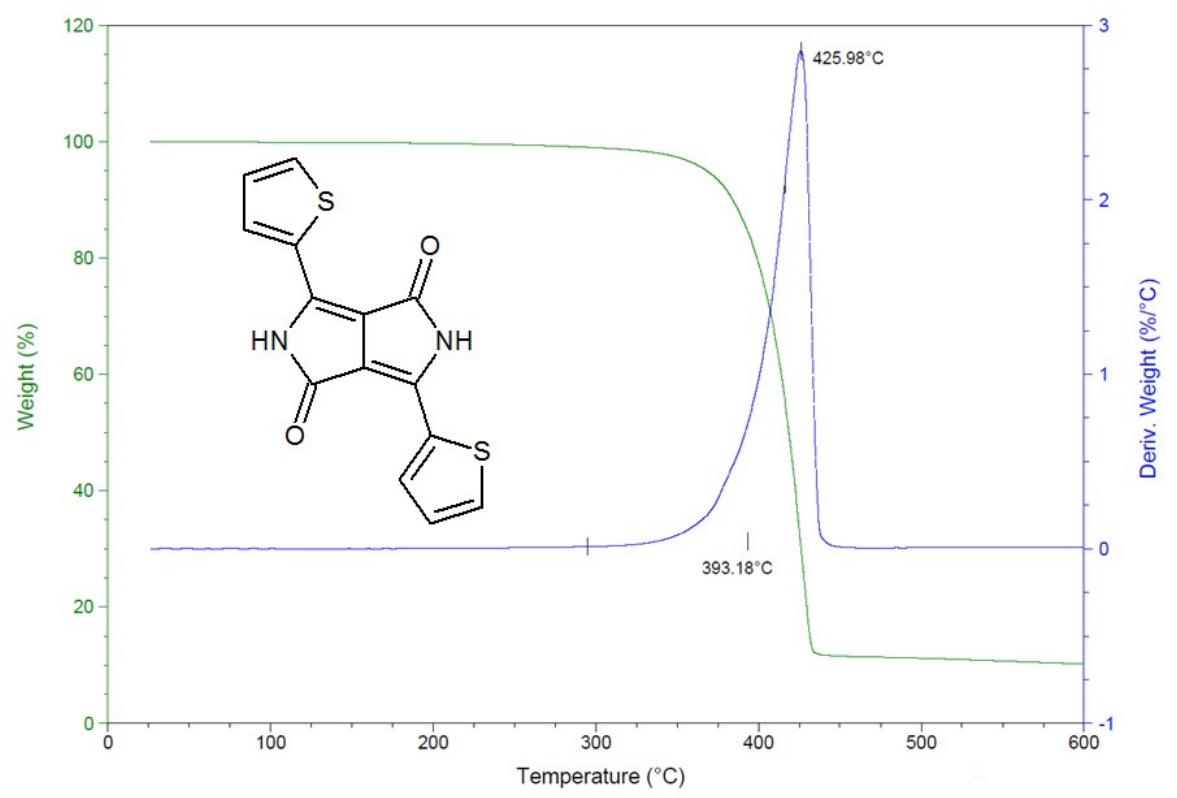

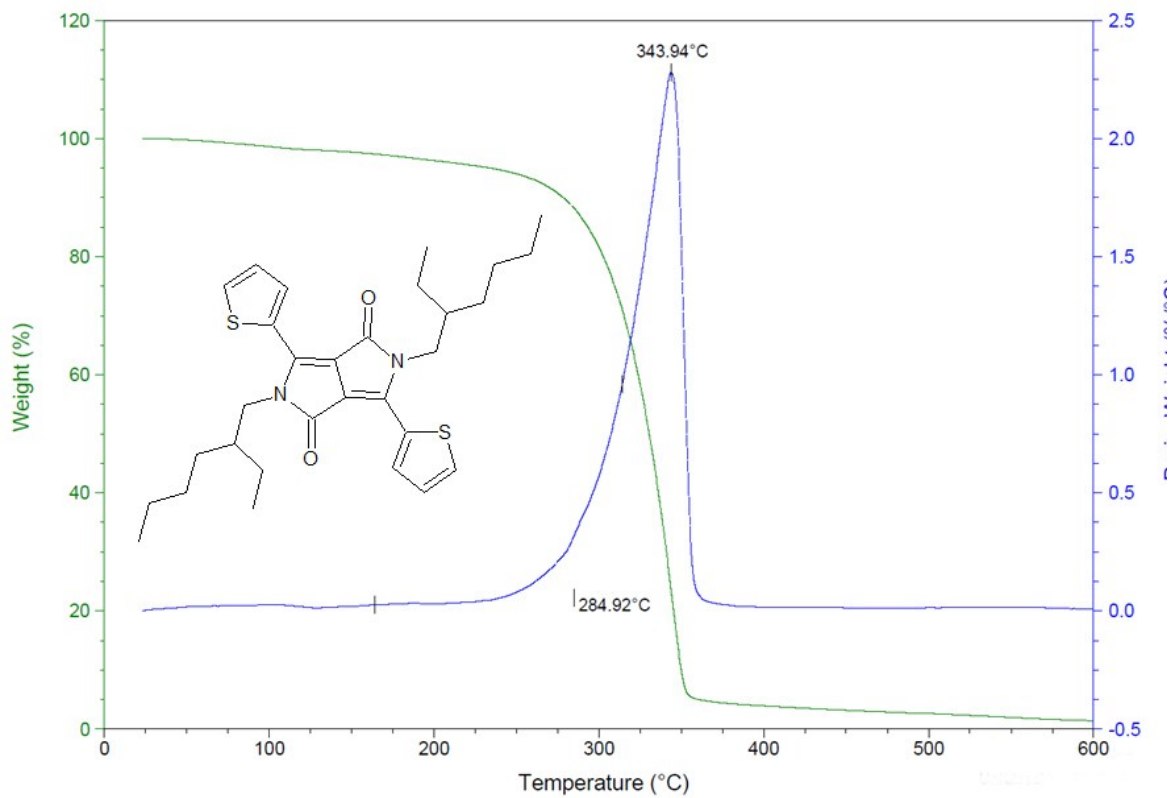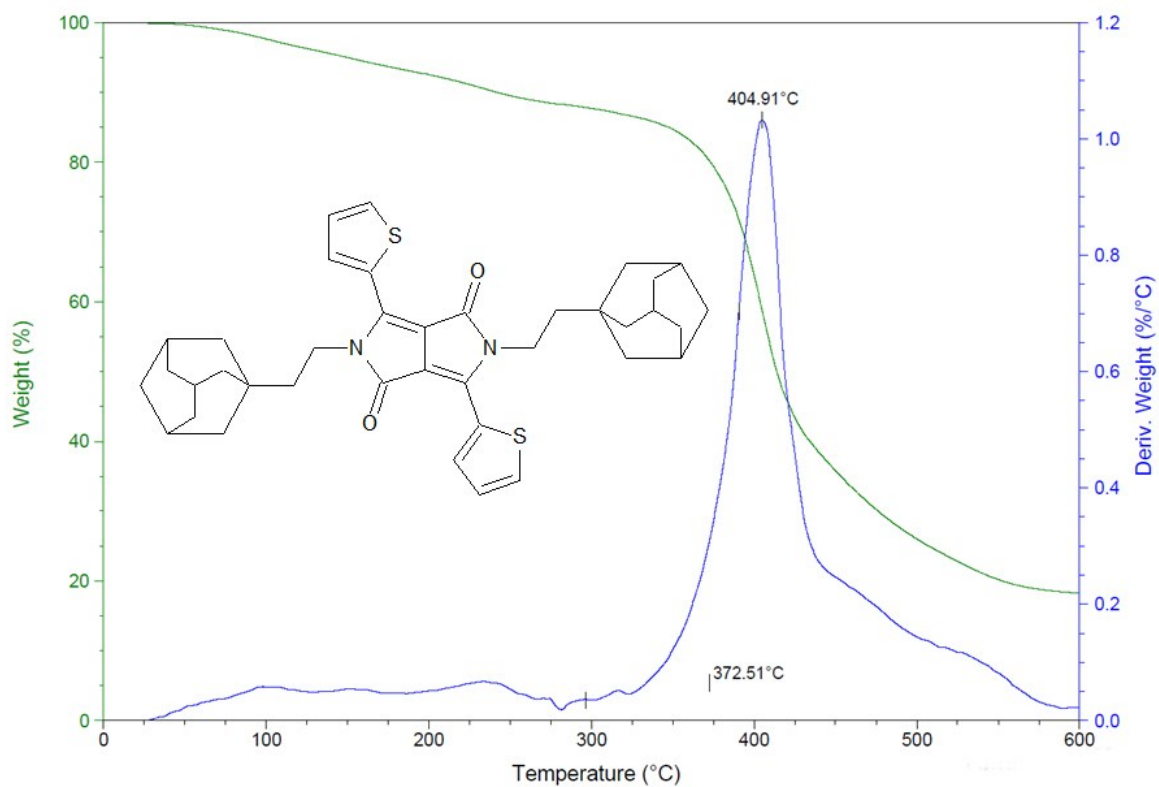

**Transfer curve for ethylhexyl N-substituted DPP-based solution processed OFET**

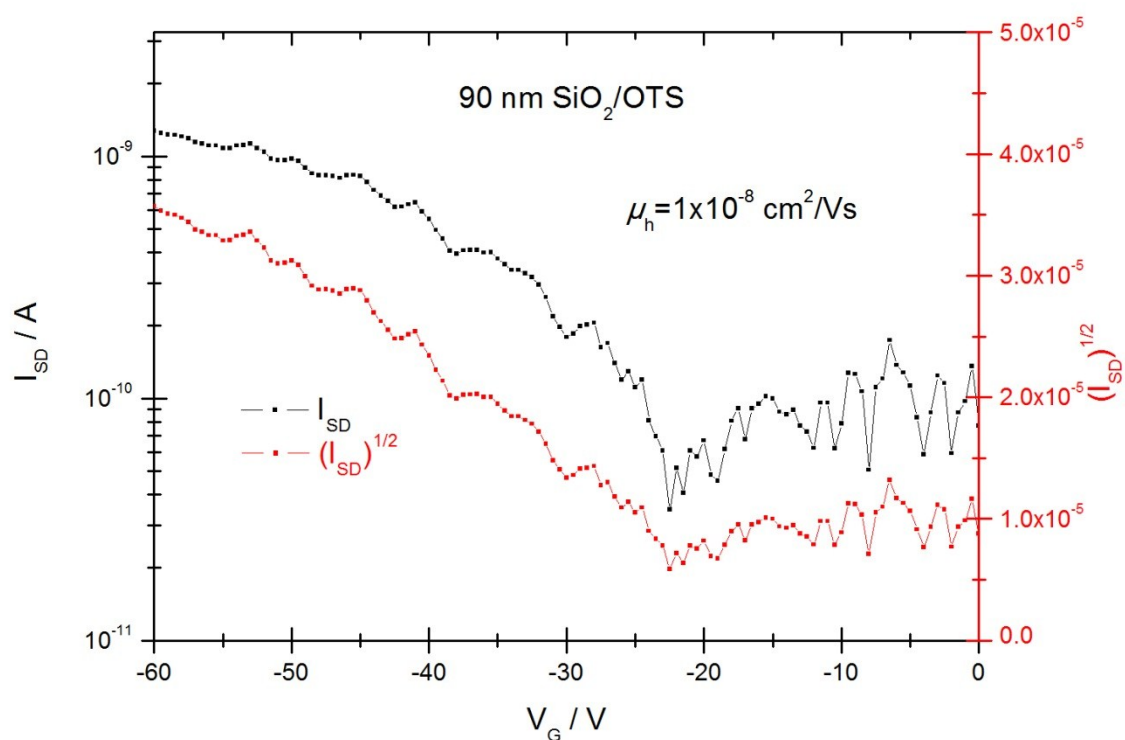

**Transfer curve for ethyladamantyl N-substituted DPP-based solution processed OFET**

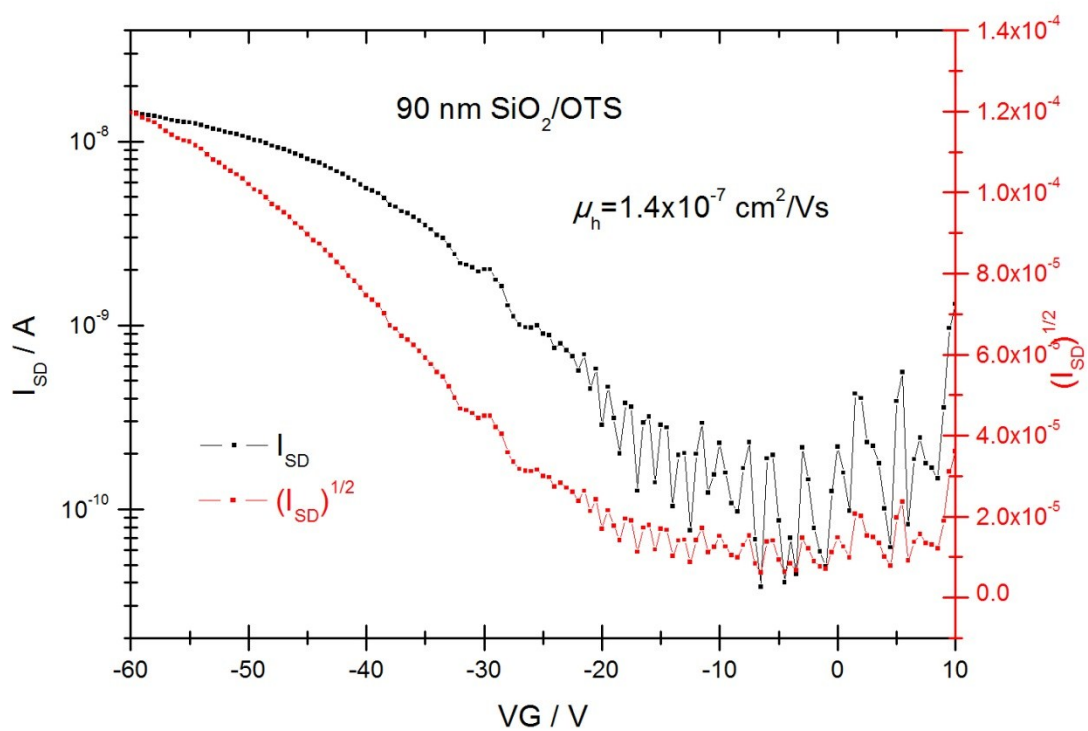

Supplement: c6tc05076j1.pdf [file c6tc05076j1.pdf]
